# Supplementary material for: The Peptidoglycan Pattern of Staphylococcus carnosus TM300—Detailed Analysis and Variations Due to Genetic and Metabolic Influences
Source: PubMed Central journal article supplement (PMC5187514; doi:10.3390/antibiotics5040033), 2016-09-23

# Supplementary Materials: The Peptidoglycan Pattern of *Staphylococcus carnosus* TM300—Detailed Analysis and Variations Due to Genetic and Metabolic Influences

Julia Deibert, Daniel Kühner, Mark Stahl, Elif Koeksoy and Ute Bertsche

Table S1. Bacterial strains.

| Bacterial Strain                                | Relevant Genotype                                                                                                                           | Source                                    |
|-------------------------------------------------|---------------------------------------------------------------------------------------------------------------------------------------------|-------------------------------------------|
| <i>Escherichia coli</i> BTH101                  | Bacterial-Two-Hybrid strain<br>F <sup>-</sup> , <i>cya-99 araD139 galE15 galK16 rpsL1 (Str<sup>r</sup>) hsdR2 mcrA1 mcrB1</i>               | (Karimova <i>et al.</i> , 2005)           |
| <i>Escherichia coli</i> NEB 5-alpha             | Electrocompetent cloning strain<br><i>fhuA2Δ(argF-lacZ)U169 phoA glnV44 Φ80Δ (lacZ)M15 gyrA96 recA1 relA1 endA1 thi-1 hsdR17</i>            | New England Biolabs GmbH                  |
| <i>Escherichia coli</i> XL1-Blue                | Cloning strain<br><i>recA1 endA1 gyrA96 thi-1 hsdR17(rK<sup>-</sup>, mK<sup>+</sup>) supE44 relA1 lac [F' proAB lacIqZΔM15::Tn10(tetr)]</i> | Promega GmbH                              |
| <i>Escherichia coli</i> DH5α                    | General cloning host<br><i>(( φ 80d lacZΔM15) Δ(lacZYA-argF) recA endA1 hsdR17 supE44 thi-1 gyrA96 relA1 deoR)</i>                          | (Hanahan, 1983)                           |
| <i>Escherichia coli</i> DC10B                   | <i>dam+Δdcm ΔhsdRMS endA1 recA1</i>                                                                                                         | (Monk <i>et al.</i> , 2012)               |
| <i>Staphylococcus carnosus</i> TM300            | Wild type (SK311)                                                                                                                           | (Schleifer & Fischer, 1982), (Götz, 1990) |
| <i>Staphylococcus aureus</i> N315               | Methicillin resistant strain isolated in 1982                                                                                               | (Kuroda <i>et al.</i> , 2001)             |
| <i>Staphylococcus aureus</i> SA113 Δ <i>spa</i> | <i>rsbU tcaR agr</i> mutant and three prophages, Φ 11, -12, and -13 protein A deletion mutant ( <i>spa</i> )                                | (Herbert <i>et al.</i> , 2010)            |
| <i>Staphylococcus aureus</i> RN4220             | Derivative of <i>S. aureus</i> NCTC 8325-4, acceptor for foreign DNA                                                                        | (Iordanescu & Surdeanu, 1976)             |

Table S2. Plasmids.

| Plasmid                        | Relevant Marker                                                                                                                                                                                                               | Source                          |
|--------------------------------|-------------------------------------------------------------------------------------------------------------------------------------------------------------------------------------------------------------------------------|---------------------------------|
| pJET                           | High efficiency vector system for positive selection of PCR products                                                                                                                                                          | Thermo Fisher Scientific        |
| pKT25                          | Derivative of low copy-number pSU40, carrying the first 224 amino acids of <i>B. subtilis</i> CyaA (T25 fragment), upstream of a multiple cloning site; Kan <sup>R</sup>                                                      | (Karimova <i>et al.</i> , 2005) |
| p25N                           | Derivative of low copy-number pSU40, carrying gene encoding the first 224 amino acids of CyaA (T25 fragment), downstream of a multiple cloning site; Kan <sup>R</sup>                                                         | (Claessen <i>et al.</i> , 2008) |
| pKT25- <i>zip</i>              | Derivative of low copy-number pSU40, carrying the first 224 amino acids of <i>B. subtilis</i> CyaA (T25 fragment), upstream of a multiple cloning site; 35-aa-long leucine zipper derived from protein GCN4, Kan <sup>R</sup> | (Karimova <i>et al.</i> , 2005) |
| pKT25-genomic library fragment | Genomic library of <i>S. carnosus</i> TM300 harboring gene fragments of 1000–3000 bp to cover up most of the genes involved in cell wall biosynthesis                                                                         | This work                       |
| pUT18C                         | Derivative of high copy-number pUC19, carrying gene encoding amino acids 225 to 399 of CyaA (T18 fragment), upstream of a multiple cloning site; Amp <sup>R</sup>                                                             | (Karimova <i>et al.</i> , 2005) |
| pUT18                          | Derivative of high copy-number pUC19, carrying gene encoding amino acids 225 to 399 of CyaA (T18 fragment), downstream of a multiple cloning site; Amp <sup>R</sup>                                                           | (Karimova <i>et al.</i> , 2001) |
| pUT18C- <i>zip</i>             | Derivative of high copy-number pUC19, carrying gene encoding amino acids 225 to 399 of CyaA (T18 fragment), upstream of a multiple cloning site; 35-aa-long leucine zipper derived from protein GCN4, Amp <sup>R</sup>        | (Karimova <i>et al.</i> , 2001) |
| pUT18C-Sca_1084                | pUT18C containing T18 fused in frame to the 5' end of <i>S. carnosus</i> <i>pbp2</i> ; Amp <sup>R</sup>                                                                                                                       | This work                       |
| pUT18C-Sca_1995                | pUT18C containing T18 fused in frame to the 5' end of <i>S. carnosus</i> hypothetical protein Sca_1995; Amp <sup>R</sup>                                                                                                      | This work                       |
| pUT18C-Sca_1996                | pUT18C containing T18 fused in frame to the 5' end of <i>S. carnosus</i> hypothetical protein Sca_1996; Amp <sup>R</sup>                                                                                                      | This work                       |
| pUT18C-Sca_1997                | pUT18C containing T18 fused in frame to the 5' end of <i>S. carnosus</i> hypothetical protein Sca_1997; Amp <sup>R</sup>                                                                                                      | This work                       |
| pKT25-Sca_1084                 | pKT25 containing T25 fused in frame to the 5' end of <i>S. carnosus</i> <i>pbp2</i> ; Kan <sup>R</sup>                                                                                                                        | This work                       |
| pKT25-Sca_1995                 | pKT25 containing T25 fused in frame to the 5' end of <i>S. carnosus</i> hypothetical protein Sca_1995; Kan <sup>R</sup>                                                                                                       | This work                       |
| pKT25-Sca_1996                 | pKT25 containing T25 fused in frame to the 5' end of <i>S. carnosus</i> hypothetical protein Sca_1996; Kan <sup>R</sup>                                                                                                       | This work                       |
| pKT25-Sca_1997                 | pKT25 containing T25 fused in frame to the 5' end of <i>S. carnosus</i> hypothetical protein Sca_1996; Kan <sup>R</sup>                                                                                                       | This work                       |

Table S3. Oligonucleotides.

| Primer                         | Sequence                                                                         | Restriction Enzyme | Construct Description                                                                    |
|--------------------------------|----------------------------------------------------------------------------------|--------------------|------------------------------------------------------------------------------------------|
| pUT18C for                     | AGCGGACGTTCTGAAGTTCTC                                                            |                    | Sequencing                                                                               |
| pUT18C rev                     | GGAGCAGACAAGCCCGTCAGG                                                            |                    |                                                                                          |
| pUT18 rev                      | CTCGGTGCCCACTGCGGAAC                                                             |                    |                                                                                          |
| pKT25 for                      | ATTATGCCGCATCTGTCC                                                               |                    |                                                                                          |
| pKT25 rev                      | TGCTGCAAGGCGATTAAG                                                               |                    |                                                                                          |
| Sca_1084 for                   | TATATAGGATCCGCGTATGACGGAAAG                                                      | <i>Bam</i> HI      | pUT18-Sca- <i>pbp</i> 2 and pKT25-Sca- <i>pbp</i> 2                                      |
| Sca_1084 rev                   | TATATAGAGCTCTATAAAACGCGACAAGC TC                                                 | <i>Sac</i> I       |                                                                                          |
| Sca_1995 for                   | TATATAGGATCCAAGAGGTGGTACGATGA AT                                                 | <i>Bam</i> HI      | pUT18-Sca_1995 and pKT25-Sca_1995                                                        |
| Sca_1995 rev                   | TATATAGGTACCTCCCAACTTCCTTTATTT GA                                                | <i>Kpn</i> I       |                                                                                          |
| Sca_1996 for                   | TATATAGGATCCAATGATTAATAAATAAAGC ATGTC                                            | <i>Bam</i> HI      | pUT18-Sca_1996 and pKT25-Sca_1996                                                        |
| Sca_1996 rev                   | TATATAGGTACCATTTCATCGTACCACCTCT TC                                               | <i>Kpn</i> I       |                                                                                          |
| Sca_1997 for                   | TATATAGGATCCCTTGAAGAAGAAATTTGA TTTG                                              | <i>Bam</i> HI      | pUT18-Sca_1997 and pKT25-Sca_1997                                                        |
| Sca_1997 rev                   | TATATAGGTACCTGACATGCTTTAATTTA ATC                                                | <i>Kpn</i> I       |                                                                                          |
| Sca_1995–1997 up for           | GGTACCATATCAATTCGGCTGTATC                                                        | <i>Kpn</i> I       | Sca_1995–1997 knock out construct upstream fragment                                      |
| Sca_1995–1997 up rev           | atgtcccaaCCCGGGCTCCTATCCATATTATT C                                               | <i>Sma</i> I       | Sca_1995–1997 knock out construct upstream region; overlap region to downstream fragment |
| Sca_1995–1997 down for         | ggataggagCCCGGGTTGGGACATGTTGAAT AC                                               | <i>Sma</i> I       | Sca_1995–1997 knockout construct downstream region; overlap region to upstream fragment  |
| Sca_1995–1997 down rev         | GTCGACCCCCTCCCTTAATTTAATTG                                                       | <i>Sal</i> I       | Sca_1995–1997 knockout construct; downstream fragment                                    |
| ermB-for                       | CCCGGGTACCGTTCGTATAGCATAACA                                                      | <i>Sma</i> I       | <i>erm</i> B cassette binding at <i>lox</i> 71                                           |
| ermB-rev                       | CCCGGGTACCGTTCGTATAATGTATG                                                       | <i>Sma</i> I       | <i>erm</i> B cassette binding at <i>lox</i> 66                                           |
| Sca_1997 for-TTG               | GGATCCTAAATTAGGAGGTATTAATTTTGA AGAAGAAATTGATTTGG                                 | <i>Bam</i> HI      | native start codon TTG, full operon Sca_1995–1997                                        |
| Sca_1997 for ATG               | GGATCCTAAATTAGGAGGTATTAATTTATGA AGAAGAAATTGATTTGGA                               | <i>Bam</i> HI      | optimized start codon ATG; full operon Sca_1995–1997                                     |
| Sca_1996 for                   | GGATCCTAAATTAGGAGGTATTAATTTATGA TTAATTTAAAGCATGTC                                | <i>Bam</i> HI      | truncated operon Sca_1995–1996                                                           |
| Sca_1995 rev                   | CCCGGGTTATTTGATAATATCAATCAATTC                                                   | <i>Sma</i> I       | full and truncated operon                                                                |
| Sca_1995–1997 for pRAB11-EF-Tu | ttaaataatttttaataagaaactactaacaacaagaaggaagaaagaacTTGAAGAAGAAATTGATTGGATA ATTTTC |                    | Complementation for cloning into pRAB11-EF-Tu                                            |
| Sca_1995–1997 rev pRAB11-EF-Tu | aaacgaeggccagtgttaTTATTTGATAATATCAA TCAATTCCTTTTATG                              |                    |                                                                                          |
| Sca_0214 KO Down-for           | tcgagctcgggtaccTAAAGATGGACCGTTTGC                                                |                    | overlapping region to pGS1                                                               |

Table S3. Cont.

| Primer                        | Sequence                                                      | Restriction Enzyme | Construct Description                                                              |
|-------------------------------|---------------------------------------------------------------|--------------------|------------------------------------------------------------------------------------|
| Sca_0214 KO Down-rev          | gtttctttg <b>cccggg</b> CGTTTATTATTCCTCC<br>TAAC TATG         | <i>SmaI</i>        | overlapping region to upstream fragment; additional <i>SmaI</i> restriction site   |
| Sca_0214 KO Up-for            | ataataaacg <b>cccggg</b> CAAAAGAAACATTA<br>ATAT GACCG         | <i>SmaI</i>        | overlapping region to downstream fragment; additional <i>SmaI</i> restriction site |
| Sca_0214 KO Up-rev            | ctctagaggatcccAGCGATAACAGTCTT<br>ACG                          |                    | overlapping region to pGS1                                                         |
| Sca_0214 SD <i>BamHI</i> for  | <u>GGATCCT</u> AAATTAGGAGGTATTAAT<br>TATGA AGAATTTGATTAAC     | <i>BamHI</i>       | Complementation and overexpression construct for pPTX                              |
| Sca_0214 <i>SmaI</i> rev      | <u>CCCGGGT</u> TATGAACATCCACTCTC                              | <i>SmaI</i>        |                                                                                    |
| KO Sca_0214 flanking for      | TGGCGCACTAGGCCAAATC                                           |                    | KO confirmation primer                                                             |
| KO Sca_0214 flanking rev      | ACCGCAGCAGTACCTGTTC                                           |                    |                                                                                    |
| Up SAOUHSC01850 for           | tagaattcgagctcccATCCAAATTGGTGC<br>ACG                         |                    | Up overlap Down                                                                    |
| Up SAOUHSC01850 rev           | ttttgtaatAATTCCTCCTTGAAACGT<br>TTTAT TC                       |                    | Up overlap pMAD                                                                    |
| Down SAOUHSC01850 for         | gaggaaattATTCACAAAATTAGGCATT<br>CATC                          |                    | Down overlap pMAD                                                                  |
| Down SAOUHSC01850 rev         | catgccatggtaccCAGATAAGTTATTAC<br>AATAT CGATTTC                |                    | Down overlap Up                                                                    |
| SAOUHSC01850 for <i>BglII</i> | agatcttactaacaacaaggaggaaagaacaAT<br>GA CAGTTACTATATATGATGTAG | <i>BglII</i>       | Complementation for cloning into pRAB11-EF-Tu                                      |
| SAOUHSC01850 rev <i>EcoRI</i> | gaattcttaTTATTTGTAGTTCCTCGGTA<br>TTC                          | <i>EcoRI</i>       |                                                                                    |
| SAOUHSC01850 flanking KO for  | TTAAACCACGTACATCAC                                            |                    | KO confirmation primer                                                             |
| SAOUHSC01850 flanking KO rev  | CATTAGAACAGCAACAAG                                            |                    |                                                                                    |

Notes: Restriction sites used for cloning procedure are underlined. Overlapping regions are shown in small form letters. Shine-Dalgarno sequence is highlighted in bold letters.



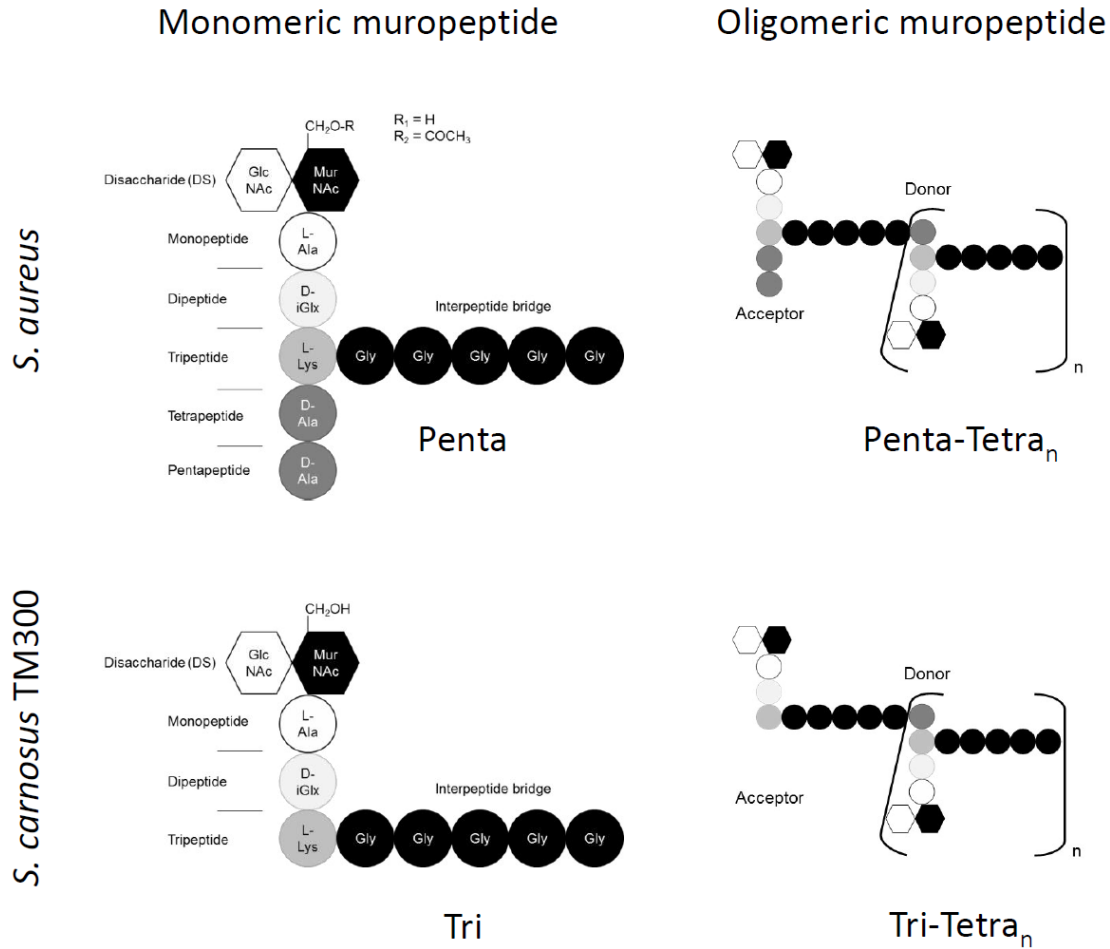

**Figure S1.** Mucopeptide structures of *S. aureus* and *S. carnosus* TM300. The PGN can be isolated and enzymatically digested into monomeric or oligomeric mucopeptides. Monomeric mucopeptides contain a disaccharide moiety ( $\beta$ -1,4-linked GlcNAc-MurNAc) and stem peptide, which in the case of *S. aureus* consists of L-Ala – DiGlu – L-Lys – D-ALA – D-Ala. Most of the D-iGlu had been amidated to D-iGln. Both are referred to as D-iGlx. The stem peptides can be cross-linked resulting in oligomeric mucopeptides. The necessary transpeptidation reaction is performed between D-Ala on position four of the donor stem peptide and the N-terminal Gly of the interpeptide bridge of the acceptor stem peptide by the expense of the last D-Ala of the donor stem peptide. The resulting tetra stem peptide of the original donor can serve as an acceptor for further cross-linking reactions. In *S. carnosus* TM300 the penta stem peptide of the first acceptor or of free acceptors is shortened to a tripeptide. GlcNAc: N-Acetylglucosamine; MurNAc: N-Acetylmuramic acid.

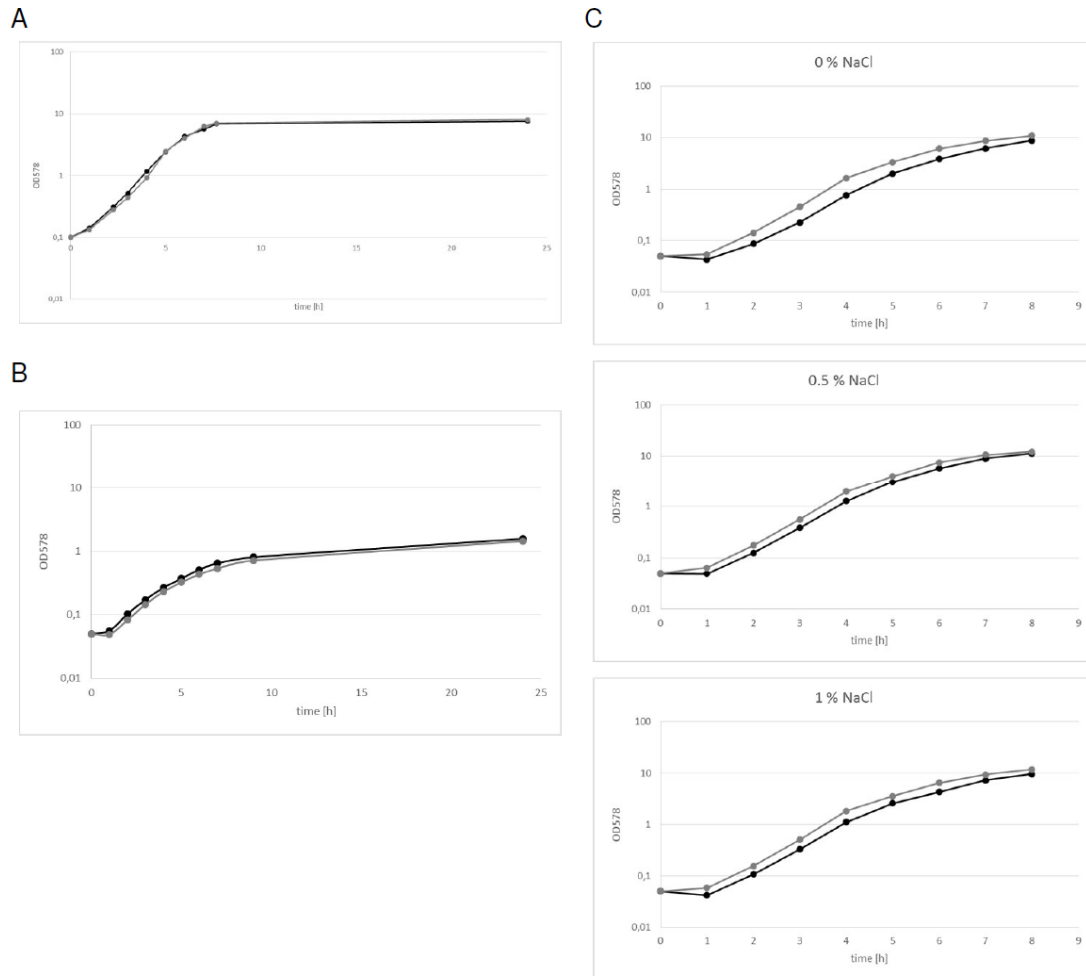

**Figure S2.** Growth behavior of *S. carnosus* TM300  $\Delta$ *hlyD-fisEX*. **(A)** The *S. c.  $\Delta$ *hlyD-fisEX** strain grown in B media showed no difference in growth behavior under standard conditions compared to *S. c. TM300*. **(B)** Limitation of nutrients has no influence on the growth behavior of *S. c. TM300  $\Delta$ *hlyD-fisEX** compared to the wild type strain *S. c. TM300*. Minimal media was supplemented with 25 mM glucose. **(C)** Different NaCl concentrations did not influence the growth behavior of *S. c. TM300  $\Delta$ *hlyD-fisEX** compared to the wild type. Growth curves were performed with B media containing either 0%, 0.5% or 1% NaCl. Black circles: *S. carnosus* TM300; Grey circles: *S. carnosus* TM300  $\Delta$ *hlyD-fisEX*.

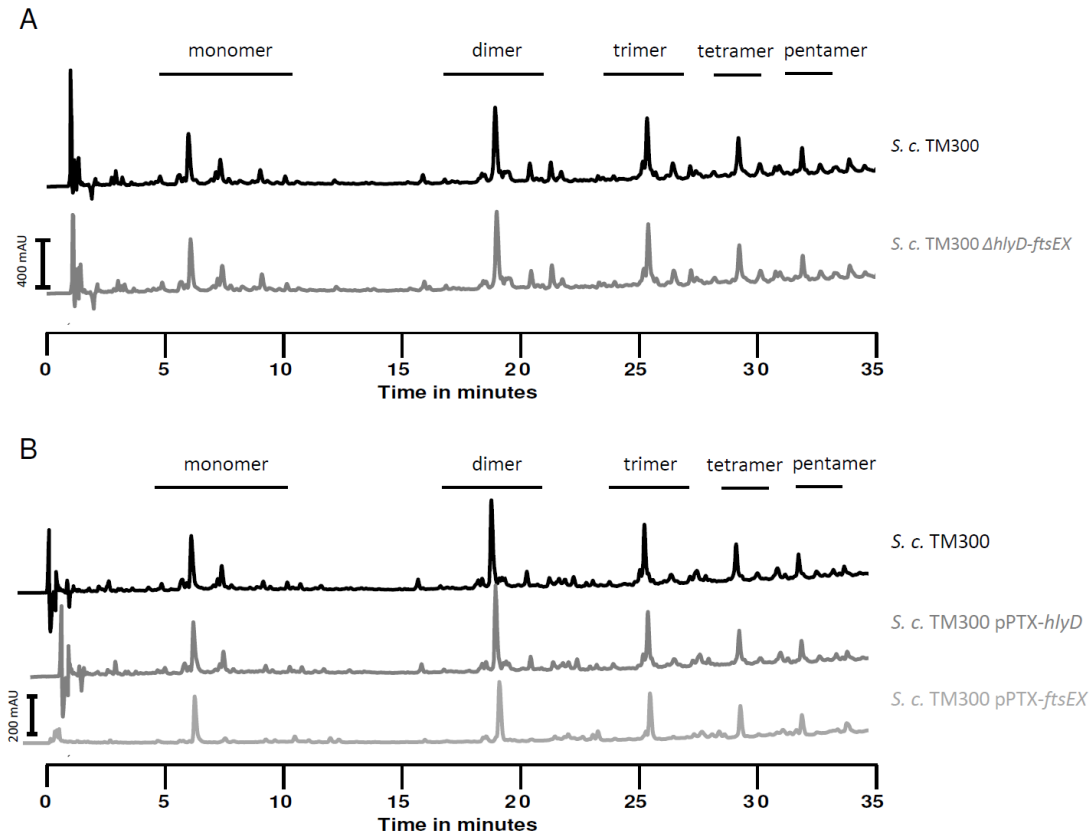

**Figure S3.** Deletion of *hlyD-ftsEX* and overexpression of single genes does not influence the peptidoglycan pattern. Main cultures were grown in B media with 25 mM xylose and cells were harvested after 8 h of growth. PGN was isolated and analyzed by UPLC. (A) No difference between the wild type strain and the *hlyD-ftsEX* deletion mutant could be detected. (B) PGN is not altered when either *hlyD* or *ftsEX* alone are overexpressed in *S. c. TM300*.

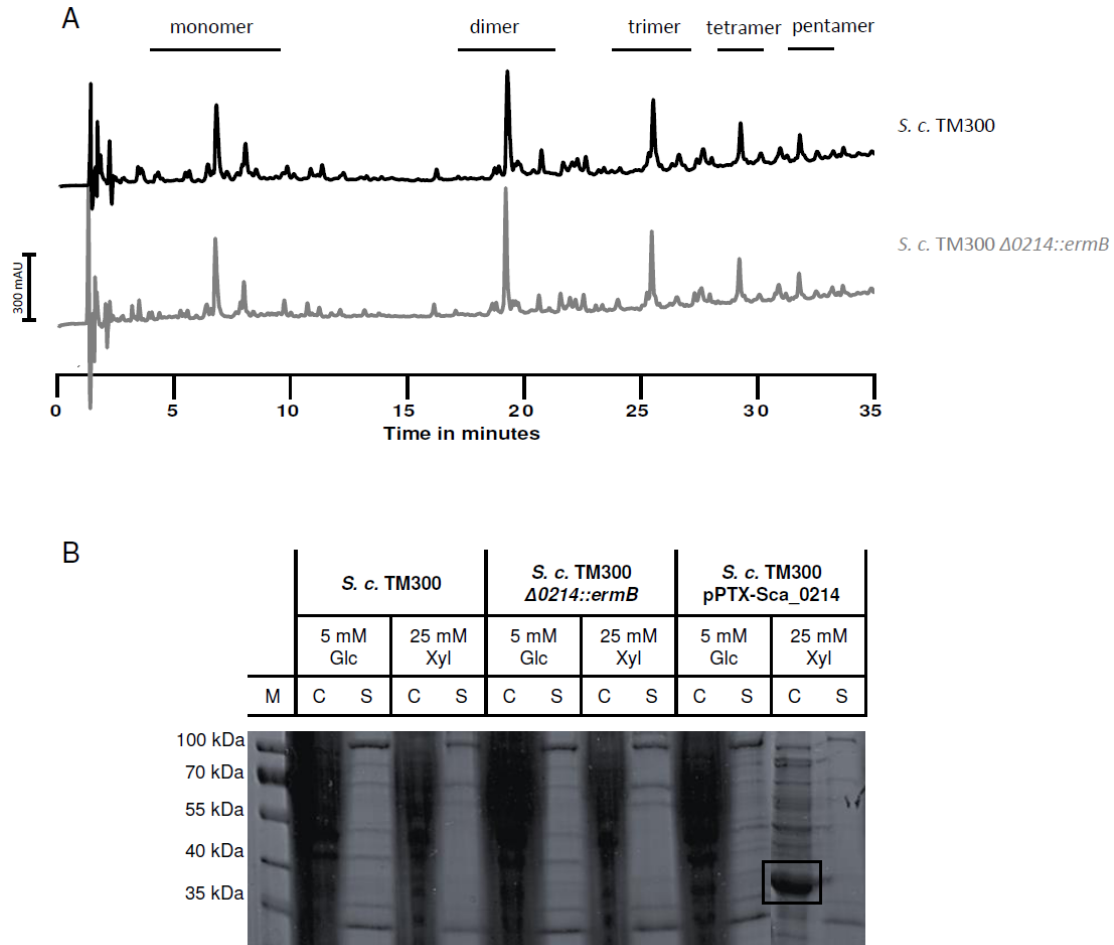

**Figure S4.** Analysis of the *S. carnosus* TM300  $\Delta 0214::ermB$  mutant and localization of the encoded protein. **(A)** Main cultures were grown for 8 hours in BM supplemented with 5 mM glucose. Deletion of *Sca\_0214* had no effect on the PGN pattern. **(B)** The putative LD-CP (*Sca\_0214*) was overproduced in *S. carnosus* TM300 to investigate its localization. Protein production in *S. c. TM300* pPTX-*Sca\_0214* was induced by 25 mM xylose (Xyl) or repressed by 5 mM glucose (Glc). Cells were harvested after 8 hours of growth and cytoplasmic (C) and extracellular proteins of the supernatant (S) were isolated and analyzed by SDS-PAGE. The LD-CP was localized in the cytoplasm (box). The calculated mass of the LD-CP is 39 kDa. In addition, the extracellular (S) protein fractions did not differ in the wild type, the *S. c. TM300*  $\Delta 0214::ermB$  mutant and the *Sca\_0214* overproduction strain, indicating that *Sca\_0214* has no influence on protein secretion.

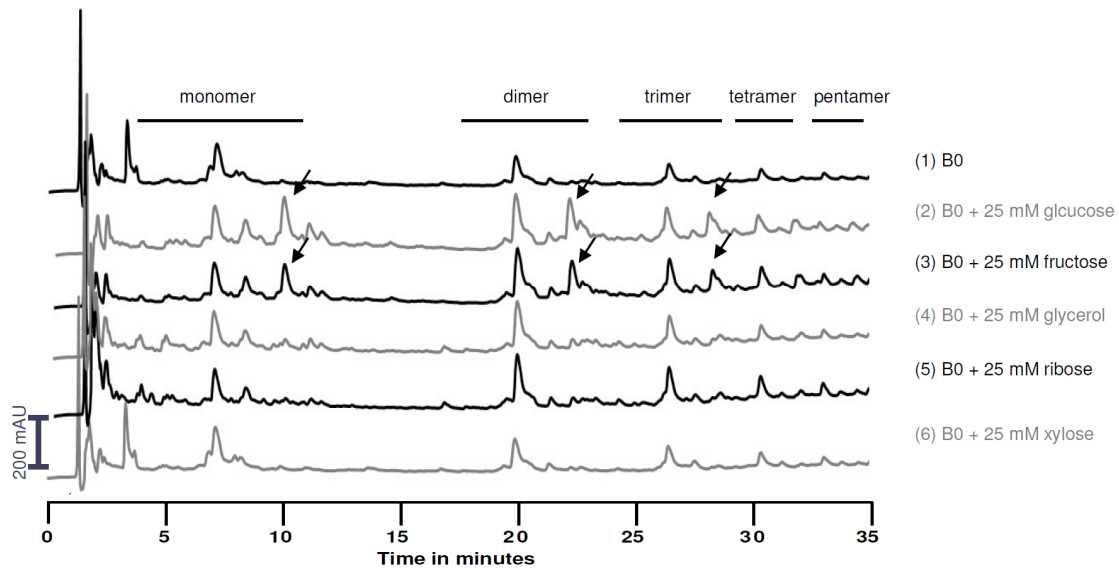

**Figure S5.** Influence of different sugars on the peptidoglycan of *S. carnosus* TM300. Main cultures were grown for 8 h in B0 media supplemented with either 25 mM glucose (panel 2), fructose (panel 3), glycerol (panel 4), ribose (panel 5), or xylose (panel 6), or without an additional carbon source (panel 1). Peptidoglycan analysis showed clearly enlarged peaks in the monomer to trimer fractions when cells had been grown in the presence of 25 mM glucose or fructose (arrows in panels 2 and 3). Glycerol, ribose and xylose did not lead to an altered peptidoglycan pattern, nor were the cells affected when no additional carbon was added to the medium (panel 1).

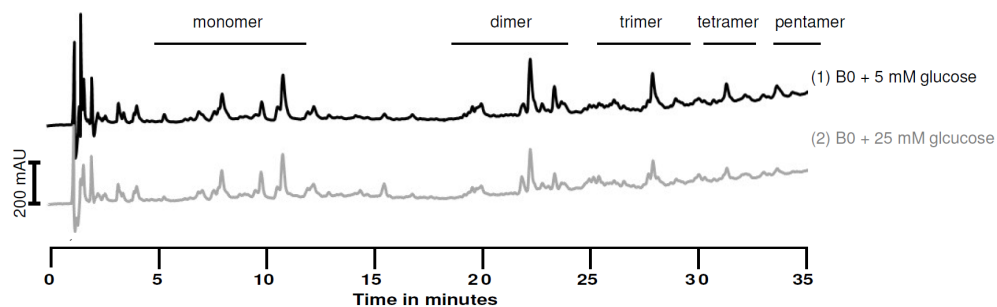

**Figure S6.** Influence of glucose on the peptidoglycan of *S. aureus* SA113  $\Delta spa$ . Main cultures were grown for 8 h in B0 media supplemented with either 5 or 25 Mm glucose. PGN was isolated and analyzed by UPLC. The muuropeptide pattern of *S. aureus* SA113  $\Delta spa$  showed no difference when grown in low (panel 1) or high (panel 2) glucose concentrations.

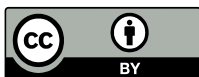

Supplement: antibiotics-05-00033-s001.pdf [file antibiotics-05-00033-s001.pdf]
